# Supplementary material for: Evidence of an interlayer charge transfer route in BiCu1−xSeO
Source: Royal Society of Chemistry journal article supplement (doi:10.1039/c3ta12094e), 2013-01-01
Supplement: c3ta12094e.pdf [file c3ta12094e.pdf]

# Evidence of an interlayer charge transfer route in $\text{BiCu}_{1-x}\text{SeO}$

Wei Xu<sup>1\*</sup>, Yong Liu<sup>2\*</sup>, Lidong Zhao<sup>3</sup>, Pengfei An<sup>1</sup>, Yuan-Hua Lin<sup>4</sup>,  
Augusto Marcelli<sup>5,6</sup>, and Ziyu Wu<sup>6,1</sup>

<sup>1</sup>*Institute of High Energy Physics, Chinese Academy of Sciences, Beijing 100049, P.R. China*

<sup>2</sup>*Laboratory of Structural Steel, Functional Materials and Heat Treatment Processing Technology, Beijing Institute of Aeronautical Materials, Beijing 100095, P.R. China*

<sup>3</sup>*Department of Chemistry, Northwestern University, Evanston IL 60208, USA*

<sup>4</sup>*State Key Laboratory of New Ceramics and Fine Processing, Department of Materials Science and Engineering, Tsinghua University, Beijing, 100084, P.R. China*

<sup>5</sup>*Laboratori Nazionali di Frascati - INFN, Via E. Fermi 40, 00044 Frascati, Rome, Italy*

<sup>6</sup>*National Synchrotron Radiation Laboratory, University of Science and Technology of China, Hefei 230026, P.R. China*

## Supplementary Materials

Figure.S1

Figure.S2

Figure.S3

Figure.S4

Table. S1

Table. S2

---

\* To whom correspondence should be addressed: [xuw@mail.ihep.ac.cn](mailto:xuw@mail.ihep.ac.cn); [liuy431@gmail.com](mailto:liuy431@gmail.com)

Figure.S1 Comparison of experimental XANES spectra of BiCuSeO and BiCu<sub>1-x</sub>SeO (x=0.015) at the Bi L<sub>3</sub>-edge, Cu and Se K-edges.

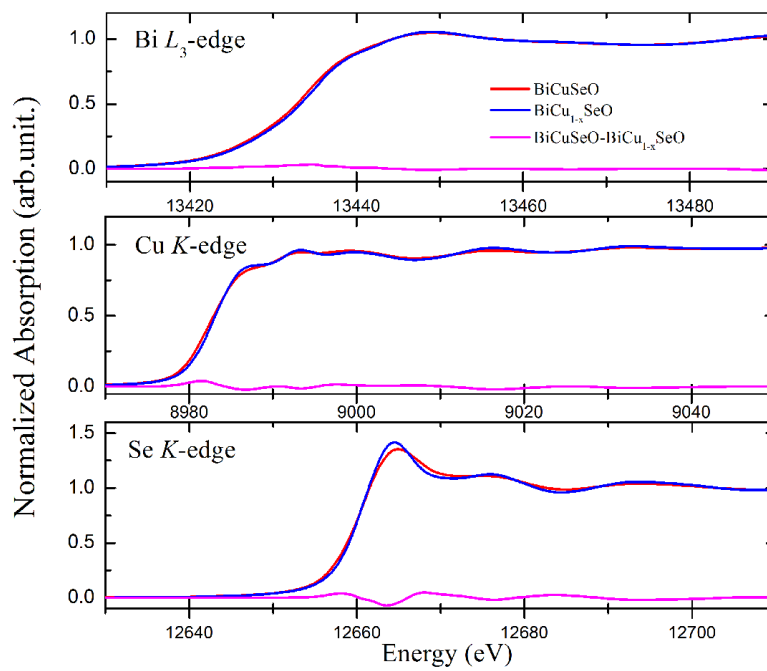

Wei Xu *et al*

Figure.S2 Comparison of spectra at Cu and Se *K*-edge among structural models with induced vacancies: 1) original structure; 2) one Cu vacancy near the excited atoms; 3) two Cu vacancies near the excited atoms in the trans and (4) cis geometry.

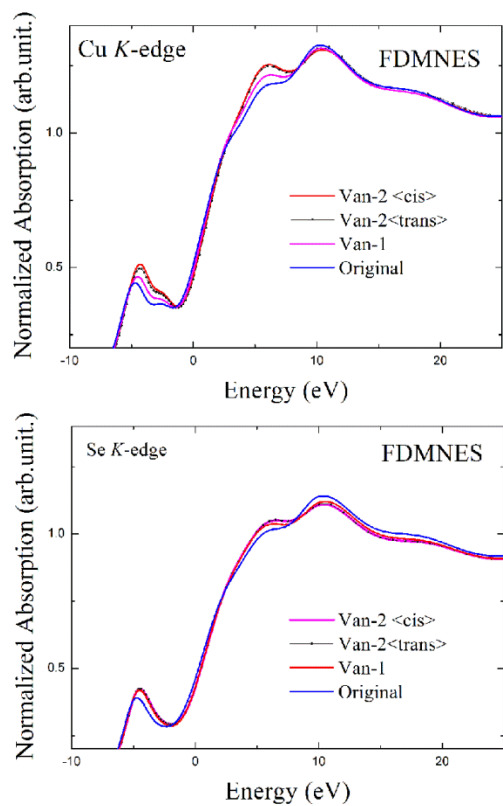

Wei Xu *et al*

Figure.S3 Comparison among orbital-specific projected density of states between BiCuSeO (upper panels) and BiCu<sub>1-x</sub>SeO (x=0.015) (lower panels) of Cu K-edge XANES simulations: (panel a) O and Bi in the BiO layer and (panel b) Cu and Se in the CuSe layer.

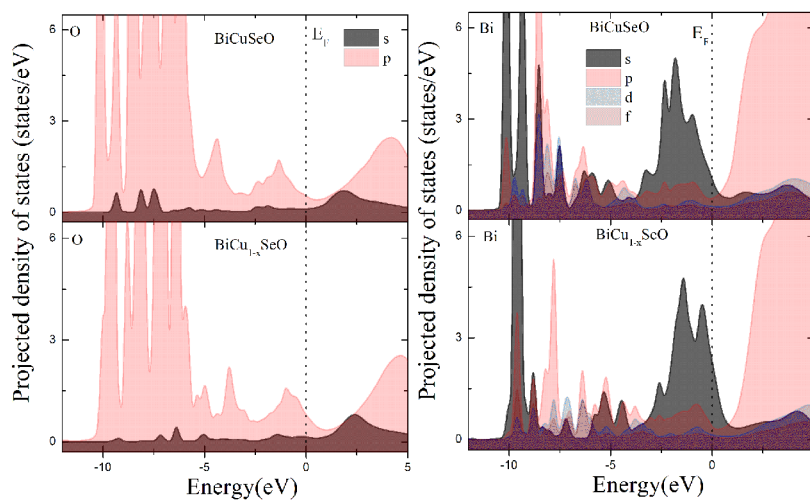

(a)

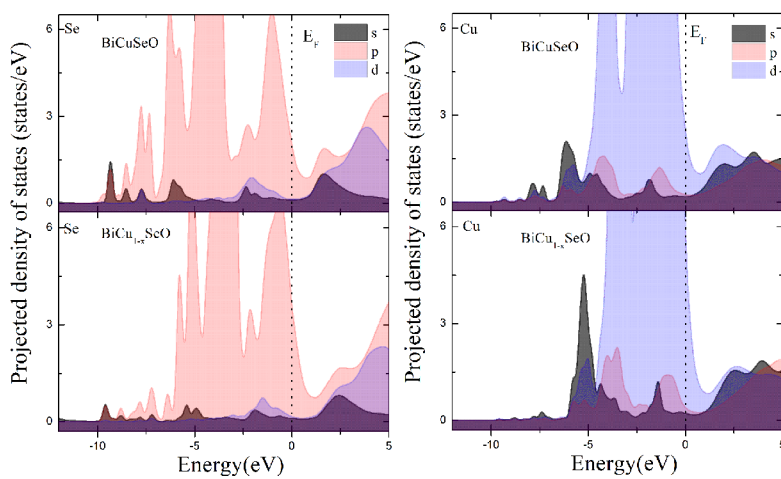

(b)

Figure.S4 Comparison of total density of states for BiCuSeO, BiCu<sub>1-x</sub>SeO, and Bi<sub>1-x</sub>SrCuSeO, with x=0.0625

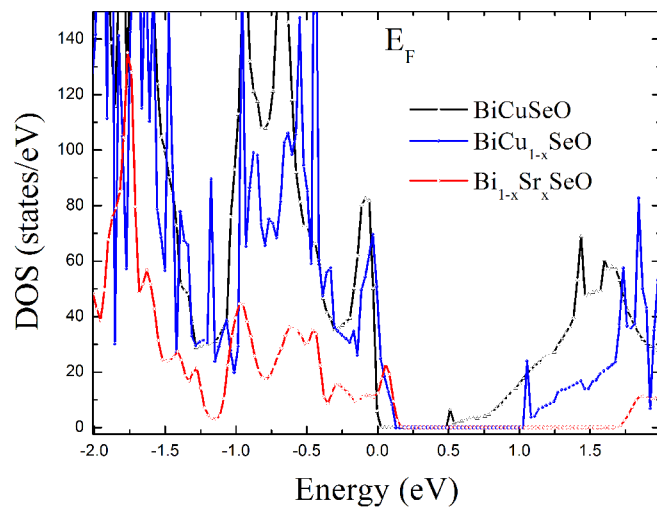

Wei Xu *et al*

Table S1. Electronic configurations and charge transfer parameters of BiCuSeO and BiCu<sub>1-x</sub>SeO (x=0.015) as from simulation of Cu and Se K-edges.

<sup>a</sup>CT stands for charge transfer; <sup>b</sup>Δ<sub>CT</sub> refers to the charge transfer difference between BiCuSeO and BiCu<sub>1-x</sub>SeO; Cu<sup>0</sup> and Se<sup>0</sup> are the excited Cu and Se absorber atoms, respectively.

| (a) Cu K-edge   |          |          |          |                 |                         |          |          |        |                              |
|-----------------|----------|----------|----------|-----------------|-------------------------|----------|----------|--------|------------------------------|
| Atom            | BiCuSeO  |          |          |                 | BiCu <sub>1-x</sub> SeO |          |          |        |                              |
|                 | <i>s</i> | <i>p</i> | <i>d</i> | <sup>a</sup> CT | <i>s</i>                | <i>p</i> | <i>d</i> | CT     | <sup>b</sup> Δ <sub>CT</sub> |
| Cu <sup>0</sup> | 1.036    | 1.225    | 10.237   | -0.496          | 1.036                   | 1.229    | 10.234   | -0.498 | 0.002                        |
| Bi              | 1.920    | 1.886    | 10.519   | 0.676           | 1.922                   | 1.869    | 10.517   | 0.693  | -0.017                       |
| Se              | 1.942    | 3.992    | 0.339    | -0.274          | 1.947                   | 4.044    | 0.307    | -0.298 | 0.024                        |
| Cu              | 0.650    | 0.724    | 9.669    | -0.042          | 0.650                   | 0.723    | 9.667    | -0.039 | -0.003                       |
| O               | 1.902    | 4.396    | 0.058    | -0.357          | 1.899                   | 4.396    | 0.057    | -0.353 | -0.004                       |

  

| (b) Se K-edge   |          |          |          |        |                         |          |          |        |                 |
|-----------------|----------|----------|----------|--------|-------------------------|----------|----------|--------|-----------------|
| Atom            | BiCuSeO  |          |          |        | BiCu <sub>1-x</sub> SeO |          |          |        |                 |
|                 | <i>s</i> | <i>p</i> | <i>d</i> | CT     | <i>s</i>                | <i>p</i> | <i>d</i> | CT     | Δ <sub>CT</sub> |
| Se <sup>0</sup> | 2.011    | 4.637    | 0.330    | 0.022  | 2.005                   | 4.691    | 0.294    | 0.010  | 0.012           |
| Bi              | 1.922    | 1.893    | 10.519   | 0.667  | 1.924                   | 1.873    | 10.517   | 0.687  | -0.020          |
| Se              | 1.933    | 4.003    | 0.335    | -0.272 | 1.939                   | 4.055    | 0.305    | -0.300 | 0.028           |
| Cu              | 0.643    | 0.707    | 9.679    | -0.029 | 0.643                   | 0.705    | 9.677    | -0.026 | -0.003          |
| O               | 1.903    | 4.406    | 0.058    | -0.368 | 1.900                   | 4.406    | 0.057    | -0.363 | -0.005          |

Wei Xu *et al*

Table S2. Electronic configurations and charge transfer parameters of BiCuSeO and Bi<sub>1-x</sub>Sr<sub>x</sub>CuSeO (x=0.015) as from simulation of Cu and Se K-edges. <sup>a</sup>CT stands for charge transfer; <sup>b</sup>Δ<sub>CT</sub> refers to the charge transfer difference between BiCuSeO and BiCu<sub>1-x</sub>SeO; Cu<sup>0</sup> and Se<sup>0</sup> are the excited Cu and Se absorber atoms, respectively.

| Atom            | (a) Cu K-edge |          |          |                 |                                         |          |          |        |                              |
|-----------------|---------------|----------|----------|-----------------|-----------------------------------------|----------|----------|--------|------------------------------|
|                 | BiCuSeO       |          |          |                 | Bi <sub>1-x</sub> Sr <sub>x</sub> CuSeO |          |          |        |                              |
|                 | <i>s</i>      | <i>p</i> | <i>d</i> | <sup>a</sup> CT | <i>s</i>                                | <i>p</i> | <i>d</i> | CT     | <sup>b</sup> Δ <sub>CT</sub> |
| Cu <sup>0</sup> | 1.036         | 1.225    | 10.237   | -0.496          | 1.018                                   | 1.205    | 10.228   | -0.450 | -0.046                       |
| Bi              | 1.920         | 1.886    | 10.519   | 0.676           | 1.918                                   | 1.838    | 10.511   | 0.733  | -0.057                       |
| Se              | 1.942         | 3.992    | 0.339    | -0.274          | 1.932                                   | 4.000    | 0.324    | -0.257 | -0.017                       |
| Cu              | 0.650         | 0.724    | 9.669    | -0.042          | 0.637                                   | 0.712    | 9.652    | -0.002 | -0.04                        |
| O               | 1.902         | 4.396    | 0.058    | -0.357          | 1.895                                   | 4.519    | 0.057    | -0.471 | 0.114                        |
| Sr              | x             | x        | x        | x               | 0.365                                   | 6.459    | 1.297    | -0.120 | -0.120                       |
| Atom            | (b) Se K-edge |          |          |                 |                                         |          |          |        |                              |
|                 | BiCuSeO       |          |          |                 | Bi <sub>1-x</sub> Sr <sub>x</sub> CuSeO |          |          |        |                              |
|                 | <i>s</i>      | <i>p</i> | <i>d</i> | CT              | <i>s</i>                                | <i>p</i> | <i>d</i> | CT     | Δ <sub>CT</sub>              |
| Se <sup>0</sup> | 2.011         | 4.637    | 0.330    | 0.022           | 2.003                                   | 4.633    | 0.318    | 0.046  | -0.024                       |
| Bi              | 1.922         | 1.893    | 10.519   | 0.667           | 1.920                                   | 1.845    | 10.511   | 0.724  | -0.057                       |
| Se              | 1.933         | 4.003    | 0.335    | -0.272          | 1.921                                   | 4.012    | 0.320    | -0.254 | -0.018                       |
| Cu              | 0.643         | 0.707    | 9.679    | -0.029          | 0.632                                   | 0.696    | 9.661    | .011   | -0.04                        |
| O               | 1.903         | 4.406    | 0.058    | -0.368          | 1.896                                   | 4.529    | 0.057    | -0.482 | 0.114                        |
| Sr              | x             | x        | x        | x               | 0.365                                   | 6.460    | 1.295    | -0.121 | -0.121                       |

Wei Xu *et al*
